# Supplementary material
Source: MDPI journal article supplement (https://www.mdpi.com/2075-163X/11/12/1347)
Supplement: s1 [file s1]

# Gallium-Containing Hydroxyapatite as a Promising Material for Photocatalytic Performance

Rafael Lisandro<sup>1</sup>, Thalena Lima Silva<sup>1</sup>, Francisca Pereira Araujo<sup>1</sup>, Ewerton Gomes Vieira<sup>2</sup>,  
Luzia Maria Honório<sup>1</sup>, Marcelo Barbosa Furtini<sup>1</sup>, Maria Gardennia Fonseca<sup>3</sup>, Edson  
Cavalcanti Silva-Filho<sup>1</sup> and Josy Anteveli Osajima<sup>1,\*</sup>

<sup>1</sup>Interdisciplinary Laboratory for Advanced Materials (LIMAV), UFPI, 64049-550, Teresina, PI, Brazil; rafael@ifpi.edu.br, thalena12@hotmail.com, araujop15@gmail.com, luzia\_quimica@yahoo.com.br, marcelofurtini@ufpi.edu.br, edsonfilho@ufpi.edu.br, josyosajima@ufpi.edu.br

<sup>2</sup>Federal Institute of Maranhão, IFMA, Campus Buriticupu, 65393-000, Buriticupu, MA, Brazil; ewertonvieira@ufpi.edu.br

<sup>3</sup>Núcleo de Pesquisa e Extensão - Laboratório de Combustíveis e Materiais (NPE – LACOM), Universidade Federal da Paraíba, 58051-970, João Pessoa, PB, Brazil, mgardennia@quimica.ufpb.br

\*Correspondence: josyosajima@ufpi.edu.br

## Supplementary Material

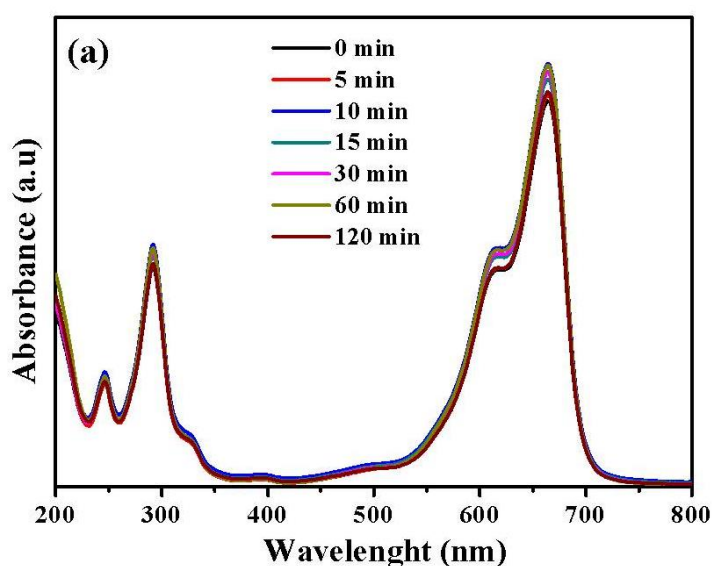

**Figure S1.** Adsorption dark test: (a) spectral variation of MB in different times.

**Table S1.** Kinetic parameters used for MB dye dislocation using Ga-Hap under UV light.

| amount of<br>photocatalyst(g·L <sup>-1</sup> ) | Temperature (°C) | Dye<br>concentration (mol.L <sup>-1</sup> ) |
|------------------------------------------------|------------------|---------------------------------------------|
| 0.25                                           | 25.0 ± 1.0       | 1.5 × 10 <sup>-5</sup>                      |
| 0.50                                           | 25.0 ± 1.0       | 1.5 × 10 <sup>-5</sup>                      |
| 1.00                                           | 25.0 ± 1.0       | 1.5 × 10 <sup>-5</sup>                      |

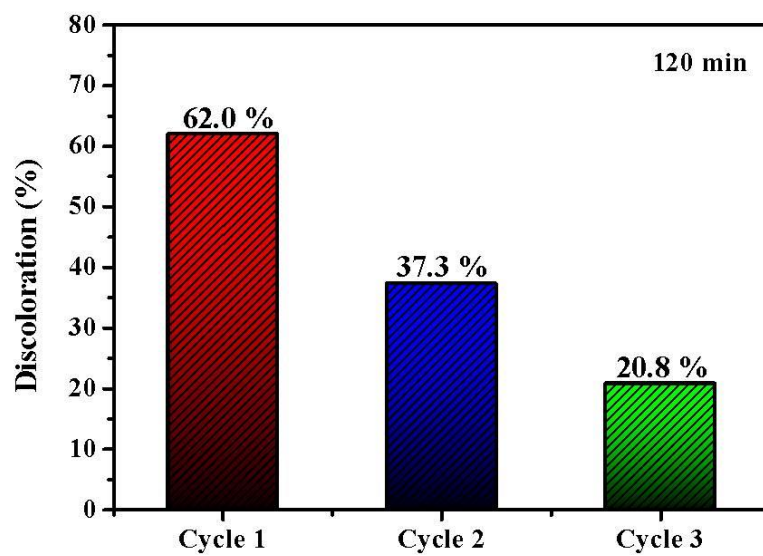

**Figure S2.** Reuse of Ga-Hap ( $1\text{g}\cdot\text{L}^{-1}$ ) using MB dye ( $1.5 \times 10^{-5} \text{ mol}\cdot\text{L}^{-1}$ ) under UV light.
